# Supplementary material for: Antihypertensive Effect of Long-Term Monotherapy with Esaxerenone in Patients with Essential Hypertension: Relationship Between Baseline Urinary Sodium Excretion and Its Antihypertensive Effect
Source: Springer Nature journal article supplement (doi:10.1007/s12325-022-02282-3), 2022-08-17
Supplement: MOESM1 [file 23374520]

**Antihypertensive effect of long-term monotherapy with esaxerenone in patients with essential hypertension: relationship between baseline urinary sodium excretion and its antihypertensive effect**

Shuichi Ichikawa<sup>a</sup>, Junko Tsutsumi<sup>b</sup>, Kotaro Sugimoto<sup>b</sup>, Satoru Yamakawa<sup>b</sup>

<sup>a</sup>Cardiovascular Hospital of Central Japan, Gunma, Japan; <sup>b</sup>Daiichi Sankyo Co., Ltd., Tokyo, Japan

**Corresponding author:**

Shuichi Ichikawa

Email: [ichikawa@ccj.or.jp](mailto:ichikawa@ccj.or.jp)

## Supplementary Material

Fig. S1 Main study design

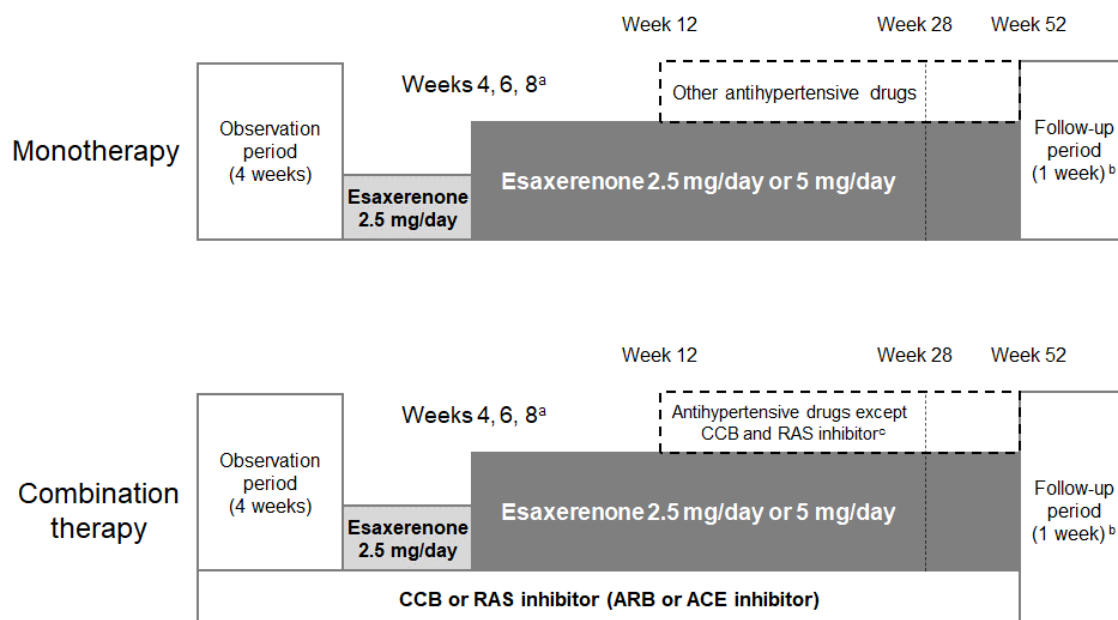

*ACE* angiotensin-converting enzyme, *ARB* angiotensin II receptor blocker, *CCB* calcium channel blocker, *RAS* renin–angiotensin system

<sup>a</sup>The esaxerenone dosage was titrated at weeks 4, 6, and 8 according to the dose escalation criteria.

<sup>b</sup>Follow-up for 1 week after week 28 or 52 with appropriate antihypertensive treatment.

<sup>c</sup>Dose escalation of the baseline CCB or RAS inhibitor, or additional use of only one additional concomitant antihypertensive drug (CCB, thiazide diuretic, or RAS inhibitor) other than a basic antihypertensive drug was permitted at week 12.

15. Rakugi H, Ito S, Itoh H, Okuda Y, Yamakawa S. Long-term phase 3 study of esaxerenone as mono or combination therapy with other antihypertensive drugs in patients with essential hypertension. *Hypertens Res.* 2019;42:1932–41.

<https://doi.org/10.1038/s41440-019-0314-7>.

**Table S1** List of the institutional review boards that approved the research protocols.

| <b>Research institute</b>                                                                    | <b>Institutional review board</b>                                                            |
|----------------------------------------------------------------------------------------------|----------------------------------------------------------------------------------------------|
| Matsuda Cardiovascular Clinic                                                                | Irahara Clinic                                                                               |
| Ono Clinic                                                                                   | Gshozuka Clinic                                                                              |
| Shoji Clinic                                                                                 | Irahara Clinic                                                                               |
| Hiro Clinic                                                                                  | Gshozuka Clinic                                                                              |
| Cardiovascular Hospital of Central Japan<br>(Kitakanto Cardiovascular Hospital) <sup>a</sup> | Cardiovascular Hospital of Central Japan<br>(Kitakanto Cardiovascular Hospital) <sup>a</sup> |
| Suzuki Clinic                                                                                | Gshozuka Clinic                                                                              |
| Gyoutoku Flower Street Clinic                                                                | Gshozuka Clinic                                                                              |
| Ebisu Clinic                                                                                 | Yaesu Sakuradori Clinic                                                                      |
| Tomo Clinic                                                                                  | Irahara Clinic                                                                               |
| Sone Clinic                                                                                  | Gshozuka Clinic                                                                              |
| Niwa Family Clinic                                                                           | Irahara Clinic                                                                               |
| Yotsuya Clinic                                                                               | Gshozuka Clinic                                                                              |
| P-One Clinic                                                                                 | P-One Clinic                                                                                 |
| Yaesu Sakuradori Clinic                                                                      | Yaesu Sakuradori Clinic                                                                      |
| ToCROM Clinic <sup>a</sup>                                                                   | Osaka Pharmacology Clinical Research<br>Hospital <sup>a</sup>                                |
| Kitada Clinic                                                                                | Yaesu Sakuradori Clinic                                                                      |
| Bandou Clinic                                                                                | Gshozuka Clinic                                                                              |
| OCROM Clinic <sup>a</sup>                                                                    | Osaka Pharmacology Clinical Research<br>Hospital <sup>a</sup>                                |
| Oak Clinic, Umeda                                                                            | Yaesu Sakuradori Clinic                                                                      |
| Hiraoka Clinic                                                                               | Yaesu Sakuradori Clinic                                                                      |

<sup>a</sup>Research institutes and institutional review boards specific to this substudy.

**Table S2** Patient composition in this *post-hoc* substudy<sup>a</sup>

|                                                      | <b>Patients (<i>n</i>)</b> |
|------------------------------------------------------|----------------------------|
| Enrolled in main study as monotherapy group          | 245                        |
| Population who continued to 52-week follow-up period | 102                        |
| Biomarker data available (pre-specified)             | 57                         |
| Continued monotherapy to the end of study (week 52)  | 25                         |
| Adding antihypertensive drugs after week 12          | 32                         |

<sup>a</sup>A total of 245 patients received esaxerenone monotherapy in the main study. Only patients in the pre-specified 52-week follow-up population who had biomarker data available ( $n = 57$ ) and continued monotherapy to the end of study were eligible for inclusion in this *post hoc* analysis ( $n = 25$ ).

**Table S3** Baseline characteristics of patients receiving esaxerenone monotherapy until week 52 in total and patient subgroups based on baseline urinary sodium excretion

| Characteristic                       | Total<br>( <i>n</i> = 25) | Baseline urinary sodium excretion |                        |
|--------------------------------------|---------------------------|-----------------------------------|------------------------|
|                                      |                           | Higher ( <i>n</i> = 13)           | Lower ( <i>n</i> = 12) |
| Male, <i>n</i> (%)                   | 17 (68.0)                 | 12 (92.3)                         | 5 (41.7)               |
| Age, years                           | 57.3 ± 7.5                | 55.5 ± 7.0                        | 59.2 ± 7.9             |
| Weight, kg                           | 67.5 ± 12.5               | 71.5 ± 10.6                       | 63.2 ± 13.3            |
| SBP, mmHg                            | 151.6 ± 5.6               | 153.0 ± 6.6                       | 150.0 ± 4.1            |
| DBP, mmHg                            | 94.9 ± 3.8                | 96.1 ± 3.8                        | 93.6 ± 3.5             |
| PAC, pg/mL                           | 115.4 ± 31.9              | 109.2 ± 27.8                      | 122.0 ± 35.9           |
| PRA, ng/mL/h                         | 0.66 ± 0.46               | 0.69 ± 0.51                       | 0.63 ± 0.42            |
| Urine, mL                            | 1970.0 ± 659.6            | 2165.4 ± 645.5                    | 1758.3 ± 632.9         |
| Urinary sodium, mEq/L                | 111.3 ± 40.8              | 135.6 ± 36.9                      | 84.9 ± 26.1            |
| Urinary sodium excretion, mEq/day    | 212.8 ± 97.4              | 283.0 ± 85.5                      | 136.8 ± 24.0           |
| Urinary potassium, mEq/L             | 32.9 ± 12.0               | 33.1 ± 11.5                       | 32.7 ± 13.1            |
| Urinary potassium excretion, mEq/day | 61.4 ± 23.3               | 69.1 ± 25.8                       | 53.1 ± 17.6            |
| Urinary Na/K ratio, %                | 3.7 ± 1.6                 | 4.5 ± 1.8                         | 2.8 ± 1.0              |
| eGFR, mL/min/1.73 m <sup>2</sup>     | 77.8 ± 11.6               | 77.5 ± 11.7                       | 78.0 ± 11.9            |
| Serum potassium, mEq/L               | 4.2 ± 0.3                 | 4.3 ± 0.3                         | 4.2 ± 0.3              |

|                        |              |              |              |
|------------------------|--------------|--------------|--------------|
| hANP, pg/mL            | 22.9 ± 10.1  | 20.5 ± 9.9   | 25.4 ± 10.1  |
| NT-proBNP, pg/mL       | 92.3 ± 95.4  | 81.0 ± 115.7 | 104.5 ± 70.3 |
| HbA1c (NGSP), %        | 5.9 ± 0.7    | 5.8 ± 0.7    | 5.9 ± 0.7    |
| LDL cholesterol, mg/dL | 137.1 ± 38.1 | 139.9 ± 45.6 | 134.0 ± 29.6 |
| Triglycerides, mg/dL   | 99.7 ± 53.1  | 106.8 ± 58.6 | 92.0 ± 47.6  |
| ALT, IU/L              | 18.8 ± 6.7   | 18.5 ± 6.7   | 19.1 ± 7.0   |

---

Values are mean ± standard deviation unless otherwise stated.

*ALT* alanine aminotransferase, *DBP* diastolic blood pressure, *eGFR* estimated glomerular filtration rate, *hANP* human atrial natriuretic peptide, *HbA1c* glycosylated hemoglobin, *K* potassium, *LDL* low-density lipoprotein, *Na* sodium, *NGSP* National Glycohemoglobin Standardization Program, *NT-proBNP* N-terminal pro-brain natriuretic peptide, *PAC* plasma aldosterone concentration, *PRA* plasma renin activity, *SBP* systolic blood pressure

**Table S4** Change from baseline of measured parameters in total and patient subgroups based on baseline urinary sodium excretion

| Parameters                        | Baseline urinary sodium excretion |                    |                    |                         |                    |                     |                        |                    |                    |
|-----------------------------------|-----------------------------------|--------------------|--------------------|-------------------------|--------------------|---------------------|------------------------|--------------------|--------------------|
|                                   | Total ( <i>n</i> = 25)            |                    |                    | Higher ( <i>n</i> = 13) |                    |                     | Lower ( <i>n</i> = 12) |                    |                    |
|                                   | Week 12                           | Week 28            | Week 52            | Week 12                 | Week 28            | Week 52             | Week 12                | Week 28            | Week 52            |
| SBP, mmHg                         | -20.8 <sup>a</sup>                | -27.6 <sup>a</sup> | -23.5 <sup>a</sup> | -26.6 <sup>a</sup>      | -27.6 <sup>a</sup> | -25.0 <sup>a</sup>  | -14.9 <sup>a</sup>     | -27.6 <sup>a</sup> | -22.1 <sup>a</sup> |
| DBP, mmHg                         | -10.3 <sup>a</sup>                | -15.2 <sup>a</sup> | -13.1 <sup>a</sup> | -13.2 <sup>a</sup>      | -14.7 <sup>a</sup> | -13.1 <sup>b</sup>  | -7.3 <sup>a</sup>      | -15.7 <sup>a</sup> | -13.2 <sup>a</sup> |
| PAC, pg/mL                        | 58.2 <sup>a</sup>                 | 53.2 <sup>a</sup>  | 70.5 <sup>a</sup>  | 58.3 <sup>b</sup>       | 59.5 <sup>b</sup>  | 62.6 <sup>b</sup>   | 58.1 <sup>b</sup>      | 47.0 <sup>b</sup>  | 78.3 <sup>b</sup>  |
| PRA, ng/mL/h                      | 0.68 <sup>a</sup>                 | 0.70 <sup>b</sup>  | 0.69 <sup>a</sup>  | 0.75 <sup>b</sup>       | 0.78               | 0.83 <sup>b</sup>   | 0.61 <sup>b</sup>      | 0.61 <sup>b</sup>  | 0.55 <sup>b</sup>  |
| Urine, mL                         | -444.8 <sup>b</sup>               | -83.0              | -319.0             | -727.1 <sup>b</sup>     | -352.3             | -670.5 <sup>b</sup> | -162.5                 | 186.4              | 67.5               |
| Urinary sodium, mEq/L             | 8.9                               | -7.7               | 3.1                | 8.8                     | -10.7              | 4.0                 | 9.0                    | -4.6               | 2.2                |
| Urinary sodium excretion, mEq/day | -53.1 <sup>b</sup>                | -31.9              | -44.0 <sup>b</sup> | -95.0 <sup>b</sup>      | -73.3              | -87.8 <sup>b</sup>  | -11.2                  | 9.5                | 4.3                |
| Urinary potassium, mEq/L          | 2.7                               | -0.3               | 4.1                | 7.6                     | 6.4                | 6.5                 | -2.3                   | -7.0               | 1.4                |

|                                      |                    |                   |                    |       |       |                   |                    |                   |                   |
|--------------------------------------|--------------------|-------------------|--------------------|-------|-------|-------------------|--------------------|-------------------|-------------------|
| Urinary potassium excretion, mEq/day | -12.2 <sup>b</sup> | -4.4              | -4.3               | -14.2 | -3.1  | -12.2             | -10.3 <sup>b</sup> | -5.6              | 4.4               |
| Urinary Na/K ratio, %                | -0.3               | -0.1              | -0.5               | -0.8  | -1.0  | -0.8              | 0.2                | 0.8               | -0.2              |
| eGFR, mL/min/1.73 m <sup>2</sup>     | -4.3 <sup>b</sup>  | -3.0              | -6.3 <sup>a</sup>  | -3.6  | -2.4  | -5.5 <sup>b</sup> | -5.0 <sup>b</sup>  | -3.6              | -7.1 <sup>b</sup> |
| Serum potassium, mEq/L               | -0.04              | 0.04              | 0.11               | 0.01  | 0.02  | 0.12              | -0.08              | 0.05              | 0.10              |
| hANP, pg/mL                          | -2.1               | -5.9 <sup>b</sup> | -5.5 <sup>b</sup>  | -1.5  | -5.1  | -5.6 <sup>b</sup> | -2.6               | -6.7 <sup>b</sup> | -5.5              |
| NT-proBNP, pg/mL                     | -32.2              | -25.1             | -46.8 <sup>b</sup> | -43.6 | -41.7 | -58.4             | -20.8              | -8.5              | -36.2             |

---

Values are means.

*DBP* diastolic blood pressure, *eGFR* estimated glomerular filtration rate, *hANP* human atrial natriuretic peptide, *K* potassium, *Na* sodium, *NT-proBNP* N-terminal pro-brain natriuretic peptide, *PAC* plasma aldosterone concentration, *PRA* plasma renin activity, *SBP* systolic blood pressure.

<sup>a</sup>*p* < 0.001 vs baseline

<sup>b</sup>*p* < 0.05 vs baseline
